# Supplementary material
Source: Springer Nature journal article supplement (https://www.springermedizin.de/resource/supplementary/12985_2010_920_MOESM3_ESM.pdf/9608746)

**A****AdTETP-IL-2/CD40L**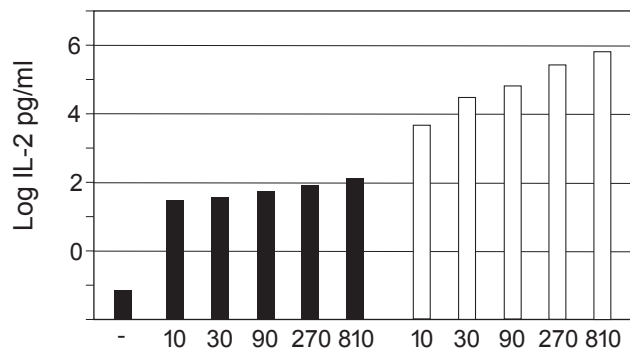**B****AdTETP-CD40L/IL-2**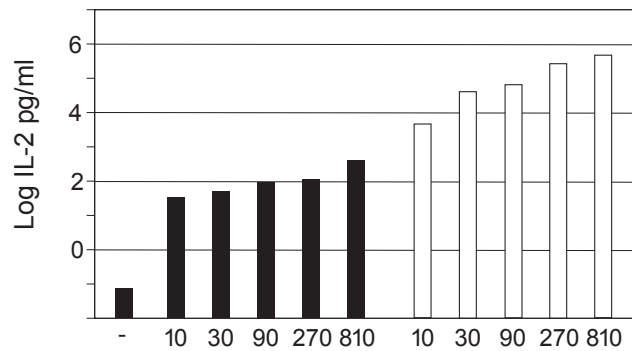**C****AdCMV-IL-2**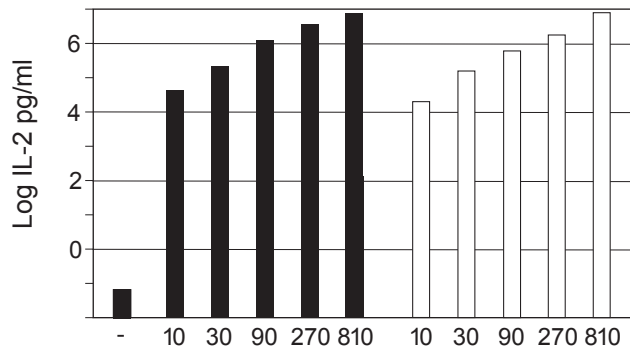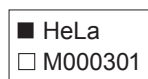

Supplement: MOESM3 [file 9608746]
